**A CRISPR/Cas9-generated zebrafish mutant implicates *PPP2R3B* loss in idiopathic scoliosis pathogenesis in Turner syndrome.**

<sup>1</sup>Marian Seda, <sup>2</sup>Berta Crespo, <sup>1</sup>Michelangelo Corcelli, <sup>1</sup>Dagan Jenkins.

<sup>1</sup>Genetics and Genomic Medicine Programme and, <sup>2</sup>Developmental Biology and Cancer Programme,  
UCL Institute of Child Health,  
London WC1N 1EH;

Correspondence should be addressed to D.J. ([d.jenkins@ucl.ac.uk](mailto:d.jenkins@ucl.ac.uk)).

## Abstract

Idiopathic scoliosis (IS) is the deformation and/or abnormal curvature of the spine that develops progressively after birth. It is a very common condition, affecting approximately 4% of the general population, yet the genetic and mechanistic causes of IS are poorly understood. Turner syndrome (TS) is caused by haploinsufficiency for a subset of genes within the pseudoautosomal region (PAR) at the tip of the short arm of the X chromosome thereby defining a critical interval for TS pathogenesis. Patients with TS present with a number of clinical features that individually represent common diseases, including an increased risk of developing IS and other skeletal symptoms. It is therefore important to assign genes within the TS critical interval to each of these disorders. Here, we focus on one gene within this interval, *PPP2R3B*, which encodes a protein phosphatase 2A regulatory subunit that interacts with the origin of replication component, CDC6. We found that *PPP2R3B* is expressed at sites of chondrogenesis within human foetuses, including the vertebrae and Meckel's cartilage. As there is no rodent orthologue of *PPP2R3B*, we used CRISPR/Cas9-mediated gene-editing to generate a frameshift mutation in zebrafish *ppp2r3b*. Adolescent zebrafish that were homozygous for this mutation exhibited a fully penetrant kyphoscoliosis phenotype which became progressively worse over time, mirroring IS in humans. These defects were associated with reduced mineralisation of vertebrae, resembling osteoporosis. Collectively, our data support a role for *PPP2R3B* haploinsufficiency in human IS pathogenesis in TS, establish a new animal model of this condition and provide a basis to investigate the underlying mechanisms.

## Author Summary

Abnormal curvature of the spine is extremely common, often developing as people age. The causes of this are not well understood and a major focus of active research is to identify the underlying genetic causes of this. In this study, we used gene-editing to create zebrafish carrying a mutation in the gene *PPP2R3B*. This is a gene linked to Turner syndrome in which patients develop spinal curvature, however, it has never been implicated in skeletal tissue maintenance before. Adolescent mutant zebrafish developed spinal curvature which became progressively worse, mirroring the human condition. This was associated with reduced formation of mineralised bone including an osteoporosis-like presentation within vertebrae. This work provides an experimental starting point to investigate the molecular and cellular mechanisms underlying spinal tissue integrity in future.

# Introduction

Turner syndrome (TS) is one of a group of aneuploidy disorders caused by partial or complete monosomy of the sex chromosomes (45X,O). It is a relatively common condition, affecting approx. 1 in 2,000 live-born girls (Stockholm et al. 2006; Elsheikh et al. 2002). For most genes on the X chromosome, only a single copy is required for normal development as they are subject to X-inactivation. A notable exception involves the pseudoautosomal region (PAR), which is common to both the X and Y chromosomes, undergoes recombination and escapes X-inactivation. As such, it is likely that many features of TS are caused by haploinsufficiency for genes located within the PAR. Moreover, partial deletions of the short arm of the X-chromosome in TS patients have suggested a critical interval including the genes *SHOX*, *PPP2R3B*, *GTPBP6* and *PLCXDI* (Boucher et al. 2001; Ross et al. 2000; Zin et al. 1998; Kääsaar & Mikelsaar 1980). In this study, we focus on *PPP2R3B* which encodes the PR70 protein, a regulatory subunit of the heterotrimeric protein phosphatase 2A holoenzyme. Relatively little is known about PR70 function, although it was identified as interacting with the origin of replication complex component CDC6 (Yan et al. 2000; Dovega et al. 2014). PR70 has also been proposed to act as a tumour suppressor by regulating firing of DNA replication origins (Van Kempen 2016).

Scoliosis is the lateral deformation and curvature of the spine which affects approximately 4% of the general population (Cheng et al. 2015). This can result from a primary defect of the bone that constitutes the vertebrae, and indeed some mouse models of scoliosis exhibit alterations of osteoblasts and chondrogenesis (Liang et al. 2018). Scoliosis can also arise secondarily to defects in proprioception (Blecher et al. 2017), which refers to the body's sense of position and reaction to external stimuli. This is driven by connections between the interneurons that relay

signals such as pain to motor neurons within the spinal cord, which in turn control muscle activity. Defects in these neuronal connections and activities can lead to progressive idiopathic scoliosis (IS). The association of muscular dystrophy with IS also emphasises the importance of musculature in maintaining spinal integrity. Another mechanism thought to lead to IS is abnormal cerebrospinal fluid flow (Grimes et al. 2016). It is therefore important to define the primary cellular origins of different genetic forms of scoliosis.

TS is associated with a variety of skeletal defects. This includes short stature, an abnormal jaw (micrognathia), as well as an increased risk of rheumatoid arthritis and scoliosis (Hanew et al. 2018; Ricotti et al. 2011; Day et al. 2007; Kim et al. 2001). The latter resembles IS and is progressive in nature with one study reporting a median onset of 9 years 11 months (Day et al. 2007). Estimates of prevalence ranging from 8.4-59% in TS have been reported (Hanew et al. 2018; Ricotti et al. 2011; Day et al. 2007). Scoliosis is also associated with growth hormone treatment which many TS patients receive. However, a high prevalence of scoliosis (35%) has also been reported in TS patients not receiving this treatment (Ricotti et al. 2011).

In this study we have used CRISPR/Cas9-mediated gene-editing to create a frameshift mutation in the zebrafish *ppp2r3b* gene. Homozygous mutant larvae appeared normal, while adolescents developed progressive kyphoscoliosis reminiscent of IS in TS. *PPP2R3B* is expressed in chondrocytes in the vertebrae and jaw in human foetuses, and the mutant scoliosis phenotype is associated with reduced vertebral bone mineralisation suggesting a primary defect in skeletal tissue homeostasis. These data identify *PPP2R3B* haploinsufficiency as a likely contributing cause of skeletal defects in TS and a new molecular target in the pathogenesis of human IS.

## Results

### Expression of *PPP2R3B* in human foetuses

Several lines of evidence led us to hypothesise that PR70 loss-of-function may underlie skeletal defects in TS. As well as localisation of *PPP2R3B* within the PAR critical interval, the PR70-interacting protein CDC6 is mutated in Meier-Gorlin syndrome which features a variety of skeletal defects including scoliosis (Bicknell et al. 2011; de Munnik et al. 2012). Furthermore, our ongoing morpholino-based screen of PAR genes in zebrafish provided initial evidence that *ppp2r3b* knockdown causes skeletal phenotypes (manuscript in preparation). To investigate this further, we looked for expression of *PPP2R3B*, and the chondrogenesis marker *SOX9*, in human foetuses.

Using *in situ* hybridisation, we noted some locations of *PPP2R3B* expression that are potentially relevant to scoliosis, albeit at foetal stages. This included interneuron and motor neuron precursors within the neural tube, dorsal root ganglia and myotome (Figure 1A). As a control, we used a GFP antisense probe with the length and GC content as the *PPP2R3B* probe, which gave no signal (Figure 1B). Expression was also noted within the vertebrae as well as Meckel's cartilage (Figure 1C,E). *PPP2R3B* transcripts were detected within cartilage condensations suggestive of a role in chondrogenesis, although it was not expressed within the perichondrium where osteoblast precursors reside prior to their migration into the cartilage matrix (Figure 1C',E'). In both of these locations, *PPP2R3B* expression co-localised with *SOX9* on adjacent sections (Figure 1D',G'). Within Meckel's cartilage, chondrocytes within cartilage condensations also expressed *SOX10*, as did the perichondrium (Figure 1F'). *SOX10*

is a marker of neural crest stem cells confirming the contribution of this lineage to skeletal elements within the jaw.

### **Generation of *ppp2r3b* mutant zebrafish using CRISPR/Cas9 gene-editing**

By aligning the human PPP2R3B protein sequence to the zebrafish translated genome, we identified only a single orthologue with significant similarity, and the genomic locus encoding Ppp2r3b showed conserved synteny with their mammalian counterparts (Figure 2A). Orthologues of neither *PPP2R3B* nor the adjacent gene, *SHOX*, are found in rodents.

To generate a constitutional genetic model of *ppp2r3b* loss-of-function, we used CRISPR/Cas9 gene-editing to target this gene using a sgRNA located within exon 2 (Figure 2B). This sgRNA was located on the forward strand and had no self-complementarity or predicted off-target sites according to the chopchop tool (<http://chopchop.cbu.uib.no/>). An *Mse I* restriction site was located within the sgRNA binding site which allowed us to monitor the efficiency with which indels were introduced at this location. Co-injection of Cas9 RNA and a sgRNA targeting *ppp2r3b* resulted in mosaic mutations (data not shown). Direct sequencing of a selection of cloned mutations from mosaic F0 embryos at 24 hpf were consistent with many previous reports in zebrafish, showing that CRISPR/Cas9 typically produces complex indels involving deletions of between 2-18 nucleotides (Figure 2B).

We have now outcrossed these F0 mosaics and their progeny for more than 5 generations to achieve germline transmission and to avoid possible off-target mutations. We isolated a line of zebrafish carrying a 7 bp deletion in exon 2 of *ppp2r3b* which results in the frameshift mutation

p.Ala31ValfsX150 (Figure 2C). Homozygous mutants are hereafter referred to as *ppp2r3b*<sup>-/-</sup>. During the course of our breeding and genotyping, we noted a single nucleotide polymorphism (SNP) located within the sgRNA binding site which is not present on publicly available databases. This SNP encodes the single amino acid substitution p.Ser33Asn. In all subsequent analyses, we selected only heterozygotes whose wild-type allele encoded the reference SNP at this location in our breeding population. We noted that there was no deviation from expected Mendelian ratios showing that this mutation does not affect viability (Figure 3). We also endeavoured to generate a pool of homozygous mutant adults with which to breed maternal-zygotic mutant zebrafish. This was not possible, because homozygotes never produced any eggs, and thus we conclude that they are infertile.

### ***ppp2r3b* homozygous mutant zebrafish exhibit a fully penetrant scoliosis phenotype**

We did not identify any phenotypic abnormalities in heterozygous or homozygous mutants at larval stages. By 48 dpf, we noted that homozygotes developed severe scoliosis (Figure 4A,B). The pattern of scoliosis was very stereotypical, characterised by two ventral curves located within the precaudal and caudal vertebrae at numbers 7-9 and 25, respectively. These ventral curves flanked a dorsal curve located at approximately caudal vertebrae number 18. There was often also a sharp lateral bend within the caudal fin, although this was not as consistent. At this age, wild-type siblings never exhibited scoliosis and the spine exhibited a very gentle ventral curvature within the precaudal region only. Scoliosis is a common phenotype in old zebrafish, presenting in excess of 18 months of age in our aquatics facility but never earlier than this. This is often associated with *Mycobacterium Chelonae* infection, however, ongoing microbiological testing confirms that this species is absent from our facility.



We monitored the onset and progression of scoliosis in *ppp2r3b*<sup>-/-</sup> mutants. Scoliosis was first seen at 36 dpf (Figure 4; Figure 5A). At this age, the typical presentation was moderate ventral curvature within the precaudal region, with relatively little curvature of the caudal vertebral regions. However, by 48 dpf, the final pattern consisting of two ventral curves and one dorsal curve was apparent. Quantification of the proportion of animals with moderate or severe kyphoscoliosis confirmed that this phenotype became worse with time (Figure 4C). At 36 and 48 dpf, the scoliosis phenotype was present in all homozygous mutants, but not in any wild-type or heterozygous siblings. Therefore, *ppp2r3b*<sup>-/-</sup> mutant zebrafish exhibit adolescent onset and progressive scoliosis, which is fully penetrant and reminiscent of human IS.

### **Scoliosis in *ppp2r3b* mutants is associated with reduced bone mineralisation of vertebrae**

To investigate this phenotype further, we analysed bone mineralisation and cartilage formation in *ppp2r3b*<sup>-/-</sup> mutants. Alizarin red staining showed that the gross structure of all vertebrae was normal without the characteristic wedging of vertebrae that has been reported previously, even at the sites of curvature (Figure 5A,B). Precaudal vertebrae 5-13 include a neural spine, which projects dorsally, and two ventrally located ribs, while the caudal vertebrae include neural and haemal spines which mirror one another in size. The ratio between the lengths of the neural and haemal spines within the caudal region showed that they were approximately equal in length in homozygous mutants as in wild-types and heterozygotes (Figure 5C). Within the precaudal region, the ribs are approximately 2.5 times longer than the neural spines (dorsal:ventral ratio of 0.4), however, we found that the ribs were relatively shorter in *ppp2r3b* homozygotes as compared to wild-types or heterozygotes (Figure 5C), suggesting a defect in

patterning and/or ossification. We also noted a marked reduction in Alizarin red staining intensity throughout the vertebral body and spines/arches, which was uniform across all vertebrae in caudal and precaudal regions (Figure 5B).

At 36 dpf, Alizarin red/Alcian blue double staining revealed a striking reduction, but incomplete loss, of articular cartilage within the joints at the distal end of the hypural bones within the caudal fin (Figure 6A). This resembles the degradation of cartilage in osteoarthritis. However, there were no differences in cartilage at all other locations including other joints. To investigate this further, we monitored the temporal course of cartilage formation. The initiation of cartilage formation in the vertebrae at 15 dpf and its subsequent maintenance at 26 dpf was normal in mutants (Figure 6B,C). Within the caudal fin, the initiation and maintenance of cartilage at 15 dpf and 26 dpf was also normal (Figure 6D,E), suggesting that its subsequent loss at 36 dpf reflected a degenerative process.

To investigate bone formation in more detail, we performed microCT scanning to compare skeletal tissue parameters of vertebrae at 36 dpf which represents the onset of scoliosis. Remarkably, this analysis showed that multiple holes were apparent throughout the mutant vertebrae (Figure 7A). This represented sites of reduced bone mineral density (BMD) which was 32% lower in mutants as compared to wild-type, when quantified throughout the cortical bone (Figure 7B). Consistent with this, tissue mineral density was also significantly reduced. However, the overall dimensions of the vertebrae, including length and diameter, were not affected suggesting a specific effect on bone mineralisation rather than morphogenesis.

# Discussion

A central aim in human genetics is to map genes to disease phenotypes. This is clearly an important problem in relation to contiguous gene deletion syndromes where a number of genes within the minimally deleted ‘critical’ interval may be suspected to contribute to overall clinical presentation according to the numbers of informative breakpoints and individual phenotypes that define the syndrome. In these cases, the phenotypes of patients carrying localised mutations in single genes causing related clinical features, or of model organisms carrying targeted mutations, can suggest causative genes for different features of the condition.

Much work has been focused toward genotype-phenotype correlations in TS, especially in relation to the causes of skeletal malformations and also lymphedema. It is now generally considered that the skeletal defects are caused by *SHOX* haploinsufficiency based on the following lines of evidence. *a)* Leri-Weill syndrome (LWS) is typically caused by large heterozygous deletions of *SHOX*, and this disorder includes high-arched palate, Madelung abnormality and scoliosis (Ross et al. 2001); *b)* *SHOX* is expressed within vertebral body growth plates in idiopathic scoliosis, expression of human *SHOX* in mice leads to congenital arthritis, and the paralogue, *Shox2*, is required for correct chondrogenesis, palatal and limb development in mice (Liang et al. 2016; Bobick & Cobb 2012; Vickerman et al. 2011; Cobb et al. 2006; Yu et al. 2005; Day et al. 2009); *c)* knockdown of *shox* in zebrafish embryos using morpholinos reduced mineralisation of the jaw/Meckel’s cartilage (Sawada et al. 2015). However, these lines of evidence are not necessarily conclusive for the following reasons. *a)* Scoliosis in LWS affects only a minority of patients, particularly those carrying large deletions within the gene. While it remains to be tested, it is possible that deletions also affect gene regulatory elements that also control neighbouring gene expression; *b)* The absence of a murine

*SHOX* orthologue means that, to date, no animal models (and only a few LWS patients) carrying a targeted mutation in this gene have been demonstrated to exhibit skeletal defects, and; *c*) the use of morpholinos can cause non-specific toxic effects during zebrafish jaw development.

In this study, we have created a targeted mutation in *ppp2r3b* in zebrafish which resulted in juvenile onset, progressive and fully penetrant kyphoscoliosis closely mirroring IS found in patents with TS. The induction and maintenance of cartilage within vertebral bodies was normal, however, subsequent bone mineralisation was markedly reduced causing an osteoporosis-like phenotype. We found that *PPP2R3B* is expressed in skeletal condensations in the jaw and vertebrae during human foetal development. We also noted a strong reduction in articular cartilage within the hypural bones of the caudal fin. Patients with TS have increased risk of developing rheumatoid arthritis (RA). Although this is predominantly considered to be an autoinflammatory disease, it has also been suggested that primary defects in chondrocytes and cartilage contribute to RA. Collectively, these results strongly suggest that *PPP2R3B* haploinsufficiency underlies skeletal defects in TS. Whether *PPP2R3B* is the sole causative gene underlying these defects, or whether loss of both *PPP2R3B* and *SHOX* act in combination remains to be shown. Both genes are located adjacent to one another on Xp, and orthologues of both are present in zebrafish and humans but have been lost in rodents. It is possible that *PPP2R3B* and *SHOX* represent an evolutionarily conserved module regulating skeletogenesis, which remains to be tested, and a number of conserved non-coding elements within the *SHOX* gene have been identified (Kenyon et al., 2011).

The zebrafish has emerged as a powerful model to study IS (Grimes et al. 2016). By generating a zebrafish mutant in *ppp2r3b*, we have been able to investigate the requirement for this gene

beyond larval stages, thereby revealing a role in bone mineralisation. *PPP2R3B* encodes the DNA origin of replication complex (ORC) regulator, PR70 (Yan et al., 2000; Dovega et al. 2014; van Kempen et al. 2016.). Core ORC components, such as CDC6, are mutated in Meier-Gorlin syndrome which features a variety of skeletal defects including scoliosis (de Munnik et al. 2012; Bicknell et al. 2011;). However, to our knowledge, nothing is known about the molecular or cellular function of the ORC in skeletogenesis. A zebrafish *cdc6* mutant has been reported, but post-larval phenotypes are potentially confounded by severe early embryonic defects and no skeletal features were reported (Yao et al. 2017). The skeletal defects that we report were degenerative in nature. It is tempting to speculate that this reflects the accumulation of DNA replication errors, and the zebrafish model that we report here provides a basis to investigate this hypothesis in future.

## Materials and methods

### *In situ* hybridisation

7µm paraffin sections were obtained from the Human Developmental Biology Resource (<http://www.hdbr.org/>). Riboprobes were synthesized with Digoxigenin-UTP RNA labeling kits (Roche) from amplified fragments of each gene using the following primers:

*GFP* (553bp): EGFP\_F, CGACGTAAACGGCCACAAG; EGFP\_R, CTGGGTGCTCAGGTAGTGG, using pEGFP-N1 plasmid as template. *PPP2R3B* (556bp): PPP2R3B\_F, CTTCTACGAGGAGCAGTGCC; PPP2R3B\_R, TTTACACGAGCCGCGGTG. *SOX10* (561bp): SOX10\_F, AGCCCAGGTGAAGACAGAGA; SOX10\_R: TCTGTCCAGCCTGTTCTCCT. Template for PCR amplification of *PPP2R3B* and *SOX10* was human cDNA. The *SOX9* probe has been reported previously (Lai et al., 2003). Human embryonic samples were fixed in 10% (w/v) neutral-buffered formalin solution (Sigma-Aldrich) and embedded in paraffin wax before sectioning. ISH was performed in 300 mM NaCl, 5 mM EDTA, 20 mM Tris-HCl, 0.5 mg/mL yeast tRNA, 10% dextran sulfate, 1x Denhardt's solution, and 50% formamide with digoxigenin-incorporated riboprobes at 68 C°. Posthybridization slides were incubated with anti-digoxigenin conjugated with alkaline phosphatase (Roche) diluted 1:1,000 in 2% newborn calf serum. Expression patterns were visualized with a Nitro-Blue Tetrazolium Chloride/5-Bromo-4-Chloro-3-Indolylphosphate p-Toluidine Salt (NBT/BCIP) system (Roche). Sections were mounted with Vectamount (Vector laboratories) and analyzed with a Zeiss Axioplan 2 imaging system.

### Zebrafish CRISPR/Cas9 mutagenesis

To create indels in the zebrafish *ppp2r3b* gene, the following sgRNA sequence was selected for targeting (5' GGAATGCTTTCACTTAAGGCTGG 3' - PAM sequence is underlined). To create the sgRNA, the following 5' phosphorylated oligonucleotides (5' TAGGAATGCTTTCACTTAAGGC 3' and 5' AAACGCCTTAAGTGAAAGCATT 3') were denatured at 95°C and annealed by cooling to 25°C using a 5°C/min ramp. Oligos were subsequently cloned into pDR274. To generate sgRNAs, the plasmid was linearised using *Dra* I and transcribed using the Megashortscript T7 kit (Invitrogen, AM1354). Capped RNA encoding Cas9 was synthesised from *Xba*I-linearised pT3TS-nCas9n plasmid using the T3 mMessage mMachine Kit (Ambion). The Poly(A) Tailing Kit (Ambion, AM1350) was used for polyA tailing of RNA. Both sgRNA and Cas9 RNA were purified using the RNeasy mini kit (Qiagen, 74104), which were subsequently co-injected (25 ng/μl sgRNA, 200 ng/μl Cas9 RNA) into zebrafish embryos at the 1 cell stage. To confirm successful mutagenesis. Total genomic DNA was extracted from individual 24 hpf embryos in 50mM NaOH at 95°C for >10 minutes, which was subsequently neutralised in 1 M Tris-HCl, pH 8.0. PCR was performed using the Phire Animal Tissue Direct PCR kit (Thermo Scientific F-140WH), which was subject to direct sequencing, T7 Endonuclease I assay (T7EI; NEB M0302L) or restriction enzyme digestion using *Mse* I (NEB R0525L).

## Morphometric analyses

Zebrafish were fixed in 10% neutral buffered formalin (NBF) for 24 h and stored in 70% ethanol until scanning. Alcian blue and Alizarin red staining was performed as described previously (Edsall et al. 2010). μCT analysis of cortical bone parameters was performed on the 1st caudal vertebra (SkyScan 1172, Bruker, Belgium). A negative offset of around 10 sections

(0.01 mm) was set in the selection of the vertebral bone. The  $\mu$ CT scanner was set at 40 Kv and 250  $\mu$ A using no filter and a pixel size of 1.85  $\mu$ m. Analysis of vertebral bone was performed ‘blind’. The images were reconstructed, analysed and visualised using SkyScan NRecon, CTAn and CTVox software, respectively. Bone mineral density (BMD) and tissue mineral density (TMD), was calibrated and calculated using hydroxyapatite phantoms with a known density.

### **Ethics Statement**

All animal procedures were authorised by Home Office Licence 70/7892 and work with human foetal tissues was authorised by the National Research Ethics Committee (REC reference, 08/H0712/34+5)



## Acknowledgements

This work was funded by a Medical Research Council New Investigator Research Grant (MR/L009978/1), Action Medical Research Project Grant (GN2595) and Wellcome Trust Collaborative Award in Science to DJ. This research was also supported by the National Institute for Health Research Biomedical Research Centre at Great Ormond Street Hospital for Children NHS Foundation Trust and University College London.

# References

Bicknell LS, Bongers EM, Leitch A, Brown S, Schoots J, Harley ME, Aftimos S, Al-Aama JY, Bober M, Brown PA, van Bokhoven H, Dean J, Edrees AY, Feingold M, Fryer A, Hoefsloot LH, Kau N, Knoers NV, Mackenzie J, Opitz JM, Sarda P, Ross A, Temple IK, Toutain A, Wise CA, Wright M, Jackson AP. Mutations in the pre-replication complex cause Meier-Gorlin syndrome. *Nat Genet.* 2011 Feb 27; 43(4):356-9.

Blecher R, Krief S, Galili T, Biton IE, Stern T, Assaraf E, Levanon D, Appel E, Anekstein Y, Agar G, Groner Y, Zelzer E. The Proprioceptive System Masterminds Spinal Alignment: Insight into the Mechanism of Scoliosis. *Dev Cell.* 2017 Aug 21; 42(4):388-399.e3.

Bobick BE, Cobb J. Shox2 regulates progression through chondrogenesis in the mouse proximal limb. *J Cell Sci.* 2012 Dec 15; 125(Pt 24):6071-83.

Boucher CA, Sargent CA, Ogata T, Affara NA. Breakpoint analysis of Turner patients with partial Xp deletions: implications for the lymphoedema gene location. *J Med Genet.* 2001 Sep 38(9):591-8.

Cheng JC, Castelein RM, Chu WC, Danielsson AJ, Dobbs MB, Grivas TB, Gurnett CA, Luk KD, Moreau A, Newton PO, Stokes IA, Weinstein SL, Burwell RG. Adolescent idiopathic scoliosis. *Nat Rev Dis Primers.* 2015 Sep 24; 1:15030.

Cobb J, Dierich A, Huss-Garcia Y, Duboule D. A mouse model for human short-stature syndromes identifies Shox2 as an upstream regulator of Runx2 during long-bone development. *Proc Natl Acad Sci U S A*. 2006 Mar 21; 103(12):4511-5.

Day GA, McPhee IB, Batch J, Tomlinson FH. Growth rates and the prevalence and progression of scoliosis in short-statured children on Australian growth hormone treatment programmes. *Scoliosis*. 2007 Feb 22; 2:3.

Day G, Szvetko A, Griffiths L, McPhee IB, Tuffley J, LaBrom R, Askin G, Woodland P, McClosky E, Torode I, Tomlinson F. SHOX gene is expressed in vertebral body growth plates in idiopathic and congenital scoliosis: implications for the etiology of scoliosis in Turner syndrome. *J Orthop Res*. 2009 Jun; 27(6):807-13.

de Munnik SA, Bicknell LS, Aftimos S, Al-Aama JY, van Bever Y, Bober MB, Clayton-Smith J, Edrees AY, Feingold M, Fryer A, van Hagen JM, Hennekam RC, Jansweijer MC, Johnson D, Kant SG, Opitz JM, Ramadevi AR, Reardon W, Ross A, Sarda P, Schrander-Stumpel CT, Schoots J, Temple IK, Terhal PA, Toutain A, Wise CA, Wright M, Skidmore DL, Samuels ME, Hoefsloot LH, Knoers NV, Brunner HG, Jackson AP, Bongers EM. Meier-Gorlin syndrome genotype-phenotype studies: 35 individuals with pre-replication complex gene mutations and 10 without molecular diagnosis. *Eur J Hum Genet*. 2012 Jun; 20(6):598-606.

Dovega R, Tsutakawa S, Quistgaard EM, Anandapadamanaban M, Löw C, Nordlund P. Structural and biochemical characterization of human PR70 in isolation and in complex with the scaffolding subunit of protein phosphatase 2A. *PLoS One*. 2014 Jul 9; 9(7):e101846.

Edsall SC, Franz-Odenaal TA. A quick whole-mount staining protocol for bone deposition and resorption. *Zebrafish*. 2010 Sep; 7(3):275-80.

Elsheikh M, Dunger DB, Conway GS, Wass JA. Turner's syndrome in adulthood. *Endocr Rev*. 2002 23:120-40.

Grimes DT, Boswell CW, Morante NF, Henkelman RM, Burdine RD, Ciruna B. Zebrafish models of idiopathic scoliosis link cerebrospinal fluid flow defects to spine curvature. *Science*. 2016 Jun 10;352(6291):1341-4.

Hanew K, Tanaka T, Horikawa R, Hasegawa T, Yokoya S. Prevalence of diverse complications and its association with karyotypes in Japanese adult women with Turner syndrome-a questionnaire survey by the Foundation for Growth Science. *Endocr J*. 2018 Mar 7.

Käosaar M, Mikelsaar AV. Partial short arm deletion of the X chromosome 46,X,del(X)(qter = to p21:). *Hum Genet*. 1980 Feb; 53(2):275-7.

Kenyon EJ, McEwen GK, Callaway H, Elgar G. Functional analysis of conserved non-coding regions around the short stature hox gene (shox) in whole zebrafish embryos. *PLoS One*. 2011; 6(6):e21498.

Kim JY, Rosenfeld SR, Keyak JH. Increased prevalence of scoliosis in Turner syndrome. *J Pediatr Orthop*. 2001 Nov-Dec; 21(6):765-6.

Lai CS, Gerrelli D, Monaco AP, Fisher SE, Copp AJ. FOXP2 expression during brain development coincides with adult sites of pathology in a severe speech and language disorder. *Brain*. 2003 Nov; 126(Pt 11):2455-62. Epub 2003 Jul 22.

Liang J, Li J, Fu Y, Ren F, Xu J, Zhou M, Li P, Feng H, Wang Y. GdX/UBL4A null mice exhibit mild kyphosis and scoliosis accompanied by dysregulation of osteoblastogenesis and chondrogenesis. *Cell Biochem Funct*. 2018 Apr; 36(3):129-136.

Liang W, Li X, Chen H, Shao X, Lin X, Shen J, Ding S, Kang J, Li C. Expressing human SHOX in Shox2SHOX KI/KI mice leads to congenital osteoarthritis-like disease of the temporomandibular joint in postnatal mice. *Mol Med Rep*. 2016 Oct; 14(4):3676-82.

Likun Yao, Jing Chen, Xiaotong Wu, Shunji Jia, Anming Meng. Zebrafish *cdc6* hypomorphic mutation causes Meier-Gorlin syndrome-like phenotype. *Hum Mol Genet*. 2017 Nov 1; 26(21): 4168–4180.

Ricotti S, Petrucci L, Carenzio G, Klersy C, Calcaterra V, Larizza D, Dalla Toffola E. Prevalence and incidence of scoliosis in Turner syndrome: a study in 49 girls followed-up for 4 years. *Eur J Phys Rehabil Med*. 2011 Sep; 47(3):447-53

Ross JL, Scott C Jr, Marttila P, Kowal K, Nass A, Papenhausen P, Abboudi J, Osterman L, Kushner H, Carter P, Ezaki M, Elder F, Wei F, Chen H, Zinn AR. Phenotypes Associated with SHOX Deficiency. *J Clin Endocrinol Metab*. 2001 Dec; 86(12):5674-80.

Ross JL, Roeltgen D, Kushner H, Wei F, Zinn AR. The Turner syndrome-associated neurocognitive phenotype maps to distal Xp. *Am J Hum Genet.* 2000 Sep; 67(3):672-81.

Sawada R, Kamei H, Hakuno F, Takahashi S, Shimizu T. In vivo loss of function study reveals the short stature homeobox-containing (shox) gene plays indispensable roles in early embryonic growth and bone formation in zebrafish. *Dev Dyn.* 2015 Feb; 244(2):146-56.

Stochholm K, Juul S, Juel K, Naeraa RW, Gravholt CH. Prevalence, incidence, diagnostic delay, and mortality in Turner syndrome. *J Clin Endocrinol Metab.* 2006 91:3897-902.

van Kempen LC, Redpath M, Elchebly M, Klein KO, Papadakis AI, Wilmott JS, Scolyer RA, Edqvist PH, Pontén F, Schadendorf D, van Rijk AF, Michiels S, Dumay A, Helbling-Leclerc A, Dessen P, Wouters J, Stass M, Greenwood CM, Ghanem GE, van den Oord J, Feunteun J, Spatz A. The protein phosphatase 2A regulatory subunit PR70 is a gonosomal melanoma tumor suppressor gene. *Sci Transl Med.* 2016 Dec 14; 8(369):369ra177.

Vickerman L, Neufeld S, Cobb J. Shox2 function couples neural, muscular and skeletal development in the proximal forelimb. *Dev Biol.* 2011 Feb 15; 350(2):323-36.

Yan Z, Fedorov SA, Mumby MC, Williams RS. PR48, a novel regulatory subunit of protein phosphatase 2A, interacts with Cdc6 and modulates DNA replication in human cells. *Mol Cell Biol.* 2000 Feb; 20(3):1021-9.

Yu L, Gu S, Alappat S, Song Y, Yan M, Zhang X, Zhang G, Jiang Y, Zhang Z, Zhang Y, Chen Y. Shox2-deficient mice exhibit a rare type of incomplete clefting of the secondary palate. Development. 2005 Oct; 132(19):4397-406.

Zinn AR, Tonk VS, Chen Z, Flejter WL, Gardner HA, Guerra R, Kushner H, Schwartz S, Sybert VP, Van Dyke DL, Ross JL. Evidence for a Turner syndrome locus or loci at Xp11.2-p22.1. Am J Hum Genet. 1998 Dec; 63(6):1757-66.

# Figures

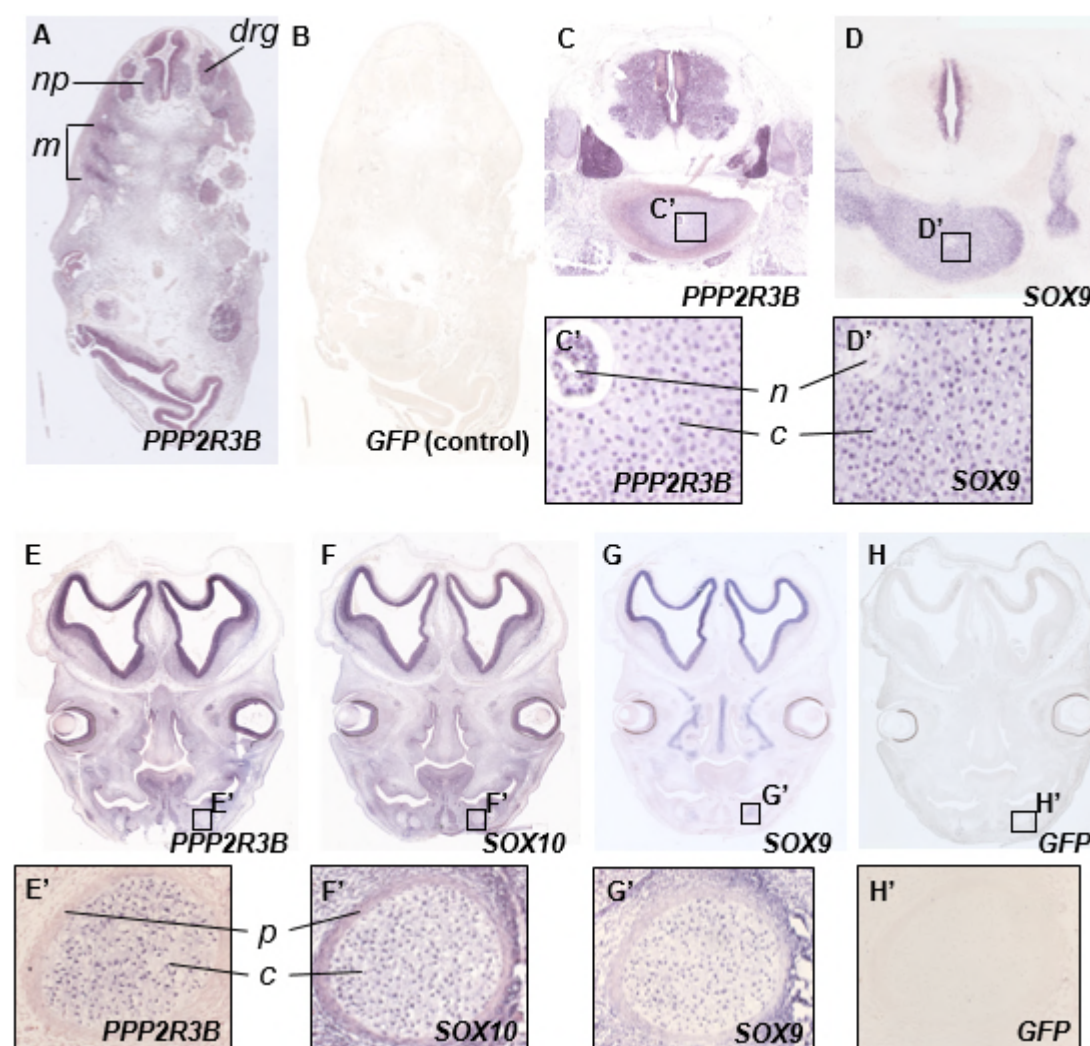

**Figure 1. *PPP2R3B* is expressed at sites of chondrogenesis in normal human foetuses.**

Expression of *PPP2R3B*, *SOX9* and *SOX10* in normal human foetuses at Carnegie stages (CS) 17 (A,B) 23 (C,D) and 22 (E-H). (A,B) *In situ* hybridisation at low power showing expression of *PPP2R3B* within interneuron/motor neuron precursors (*np*), dorsal root ganglia (*drg*) and myotome (*m*) but no signal generated using a GFP negative control. (C,D) Expression of *PPP2R3B* in vertebral bodies. Insets show regions magnified in C' and D'. Note expression in chondrocytes (*c*). *PPP2R3B* is also expressed in the notochord (*n*) whereas *SOX9* is not. (E-H) Expression of *PPP2R3B* within Meckel's cartilage (insets magnified in E'-H'). Note expression co-localises with *SOX10* and *SOX9* within chondrocytes (*c*) but expression is absent from perichondrium (*p*).



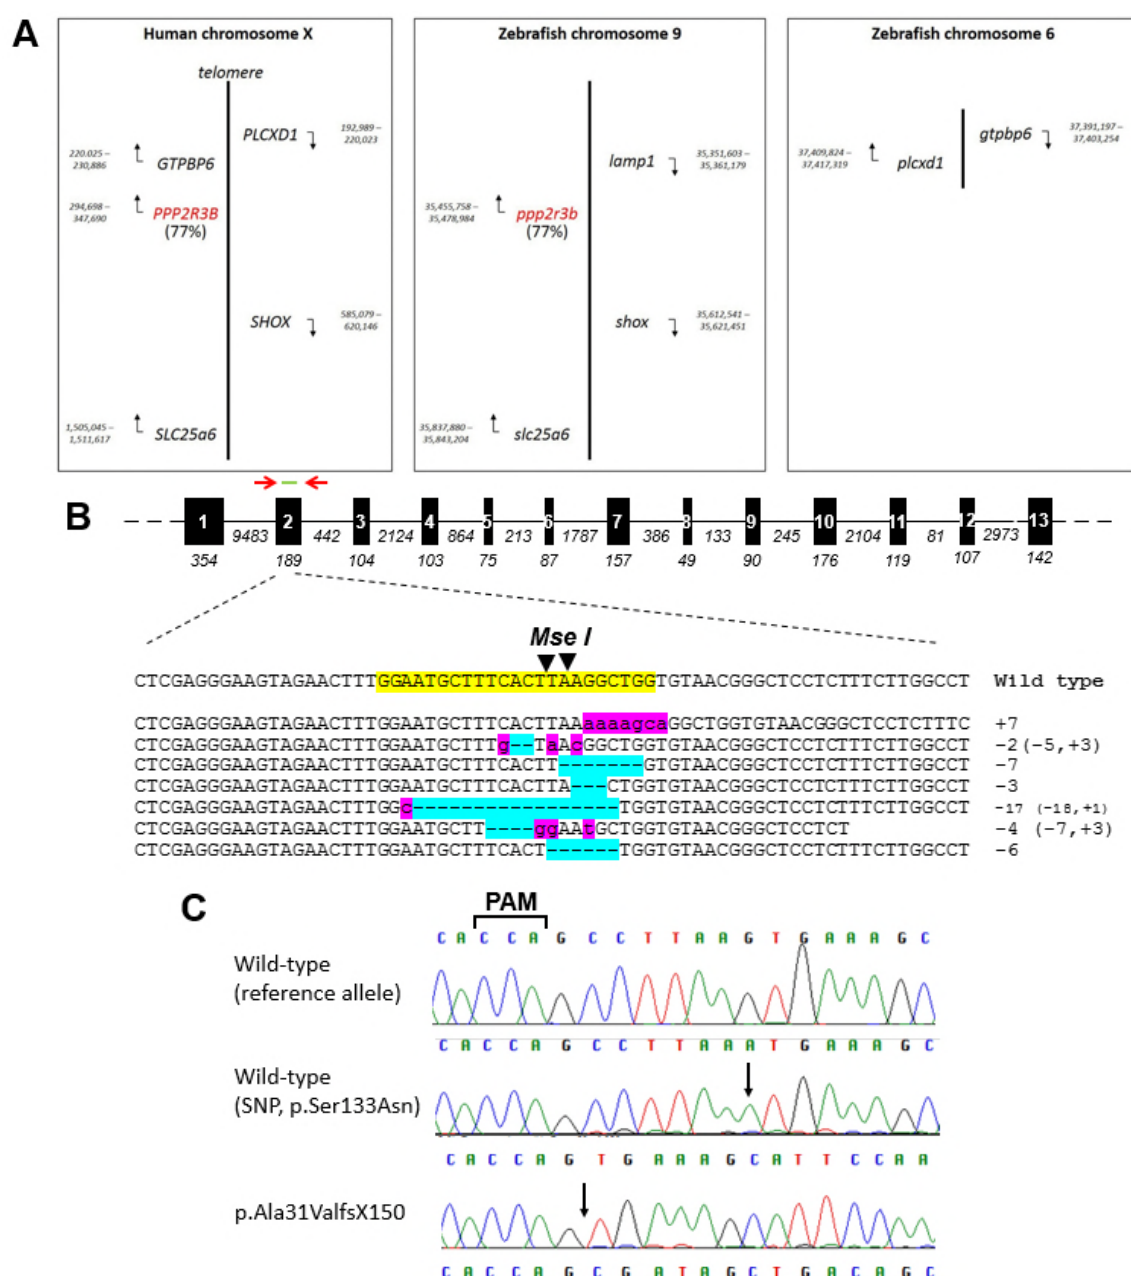

**Figure 2. Targeting *ppp2r3b* in zebrafish using gene-editing.**

(A) Schematic showing conservation of synteny between zebrafish and human *ppp2r3b/PPP2R3B*. On the left is part of the pseudoautosomal region on the human X-chromosome giving the co-ordinates of each gene, and indicating the strand from which is gene is transcribed (arrows). The percentage amino acid conservation between human and zebrafish PPP2R3B/Ppp2r3b is indicated. *Middle*- zebrafish chromosome 9 showing conserved synteny for *slc25a6*, *shox* and *ppp2r3b*, as well as the adjacent *lamp1* gene. *Right*- zebrafish chromosome 6 showing limited conserved synteny of *plcxd1* and *gtpbp6*. (B) *ppp2r3b* gene structure showing the location of primers used for genotyping (red arrows) and sgRNA (green) used for gene-editing. Below, examples of mutant sequence reads cloned from pooled F0 embryos. The sgRNA site is highlighted in yellow within the wild-type sequence. Inserted and deleted nucleotides are highlighted in pink and blue, respectively. (C) Sequence chromatograms showing the homozygous wild-type reference and alternative alleles, and the homozygous and heterozygous mutant reads.

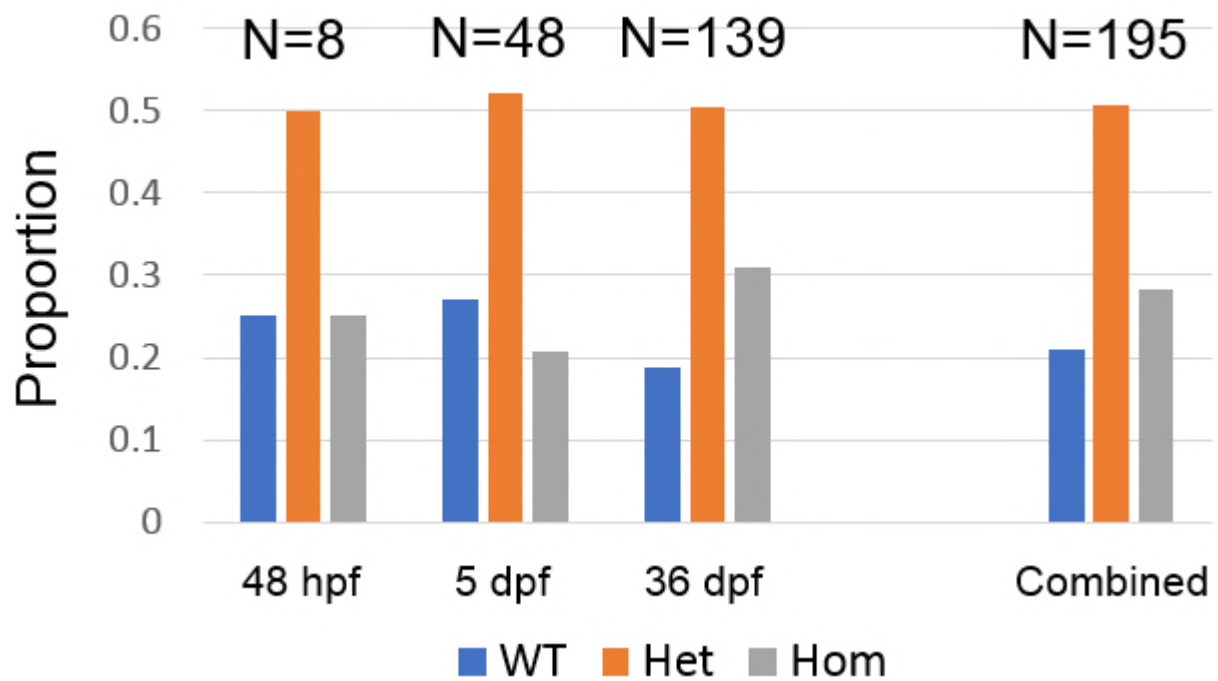

**Figure 3. *ppp2r3b* mutants are viable at all ages.**

Proportions of wild-type (WT), heterozygous (Het) and homozygous (Hom) mutant (*ppp2r3b*<sup>Ala31ValfsX150</sup>) animals at the stated ages. Total numbers of embryos analysed are indicated.

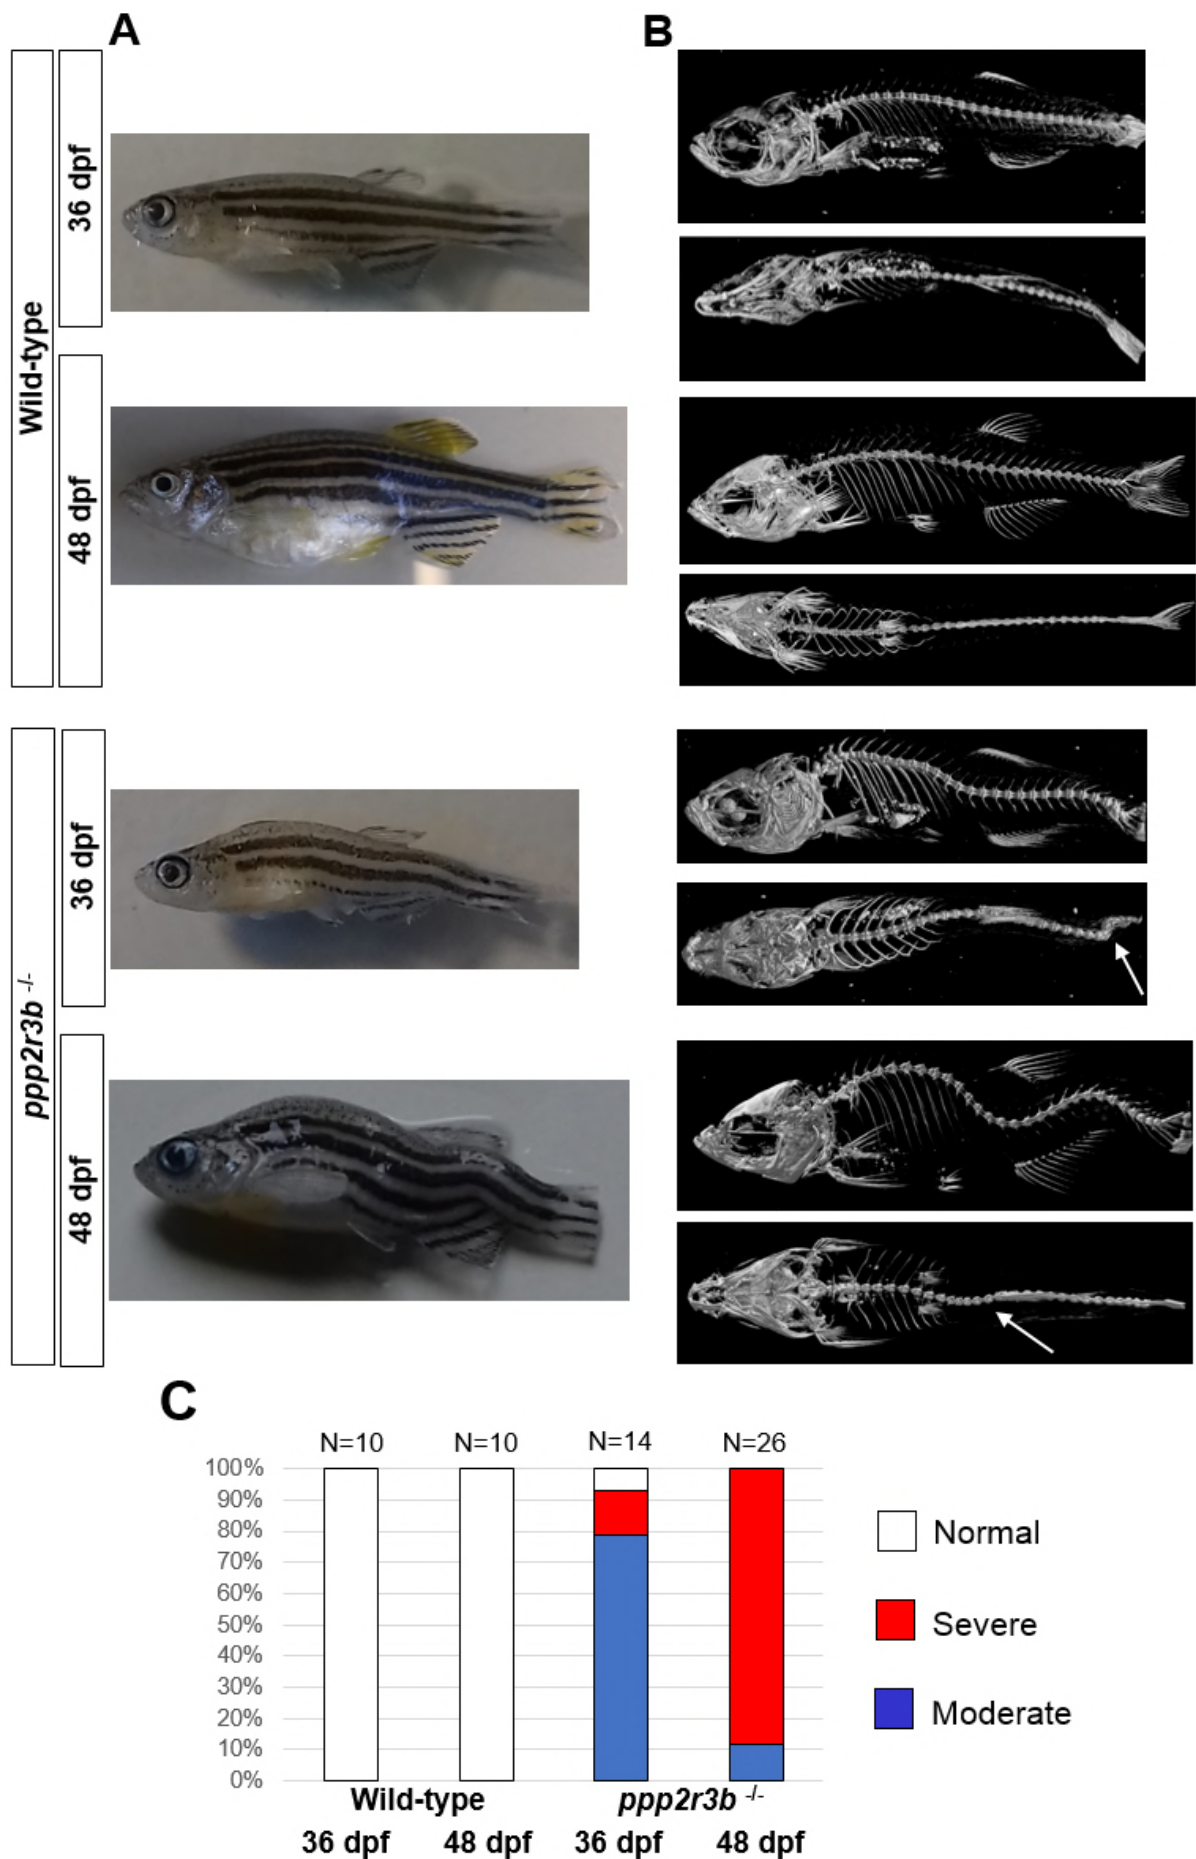

**Figure 4.** (A) Bright field images and (B) microCT scans of representative wild-type or homozygous *ppp2r3b*<sup>-/-</sup> mutant zebrafish at 36 or 48 dpf. White arrows in B point to sharp lateral curvatures of the spine. (C) Quantification of the proportion of animals with mild, moderate or severe kyphoscoliosis.

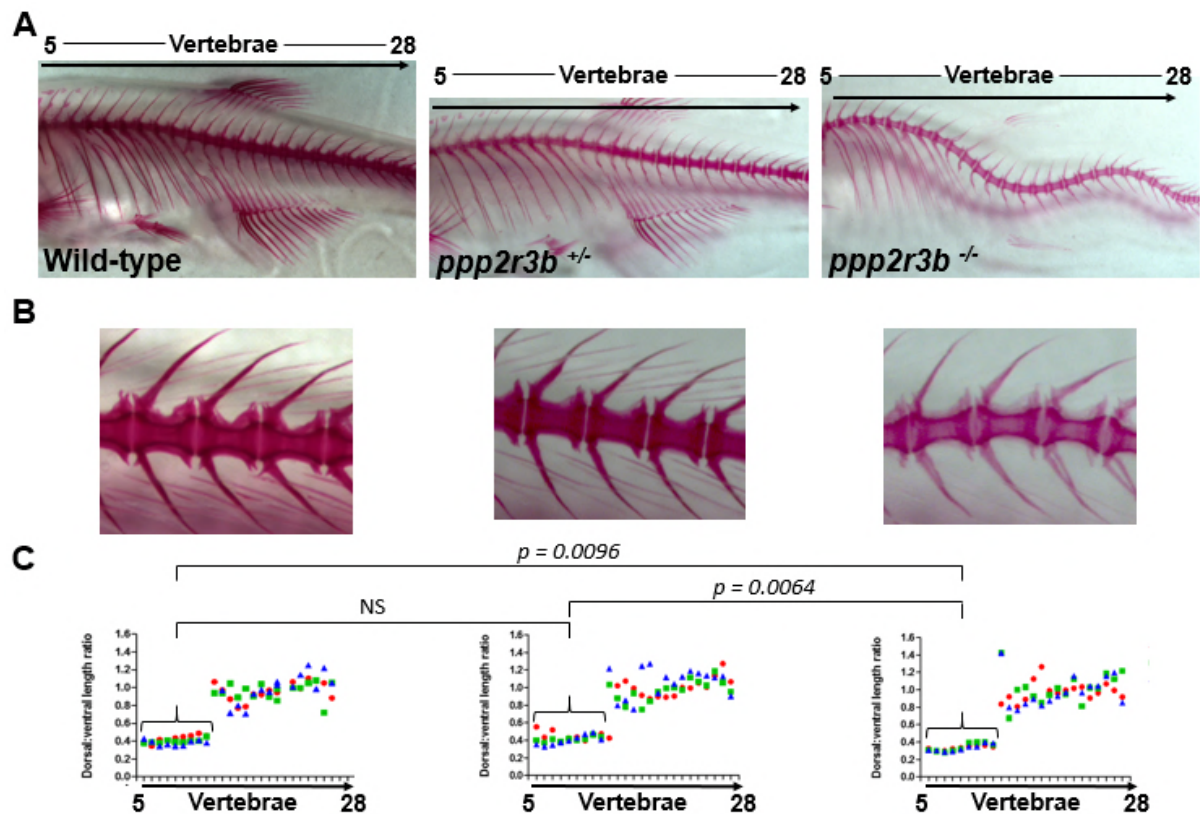

**Figure 5. Morphometric analysis of mineralised bone.**

(A,B) Alizarin red staining of vertebrae 36 dpf zebrafish of the indicated genotypes. (C) Quantification of the neural spine:hema spine/rib length ratios for vertebrae 5-28. Data-points for individual animals are indicated by different colours. Mean±standard deviation of values of these ratios averaged across all ribs for each animal, indicated by the brackets, and subsequently averaged over three animals are  $0.401 \pm 0.024$ ,  $0.423 \pm 0.029$  and  $0.335 \pm 0.005$  for wild-type, heterozygous and homozygous mutant animals, respectively. This represents a statistically significant difference in homozygotes versus each of the other two genotypes (*t-test*).



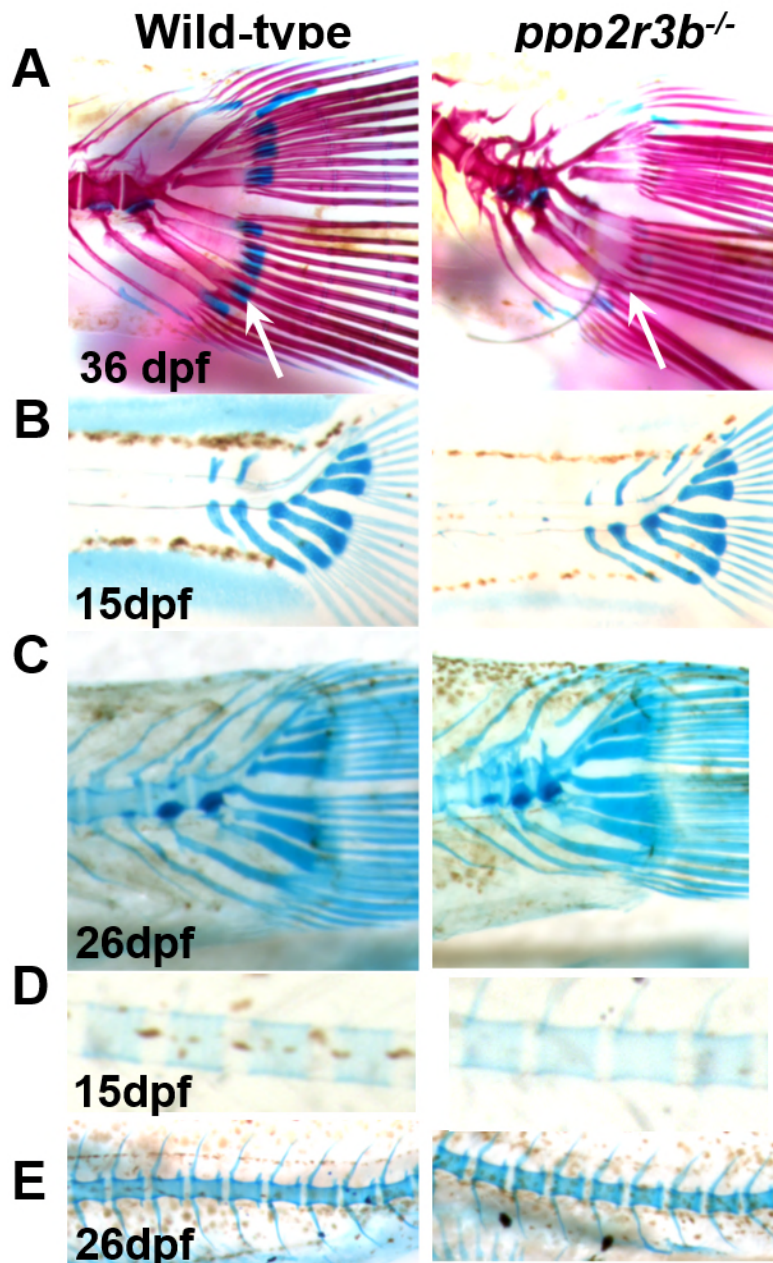

**Figure 6. Temporal analysis of cartilage.**

Articular cartilage within the hypural bones is lost by 36 dpf (A, arrows) in *ppp2r3b*<sup>-/-</sup> mutants but forms normally at 15 dpf (B) and is maintained until 26 dpf (C). Within the vertebral bodies, cartilage is induced and maintained normally (D,E) and is replaced by mineralised bone by 36 dpf (A, and data not shown) in mutants.

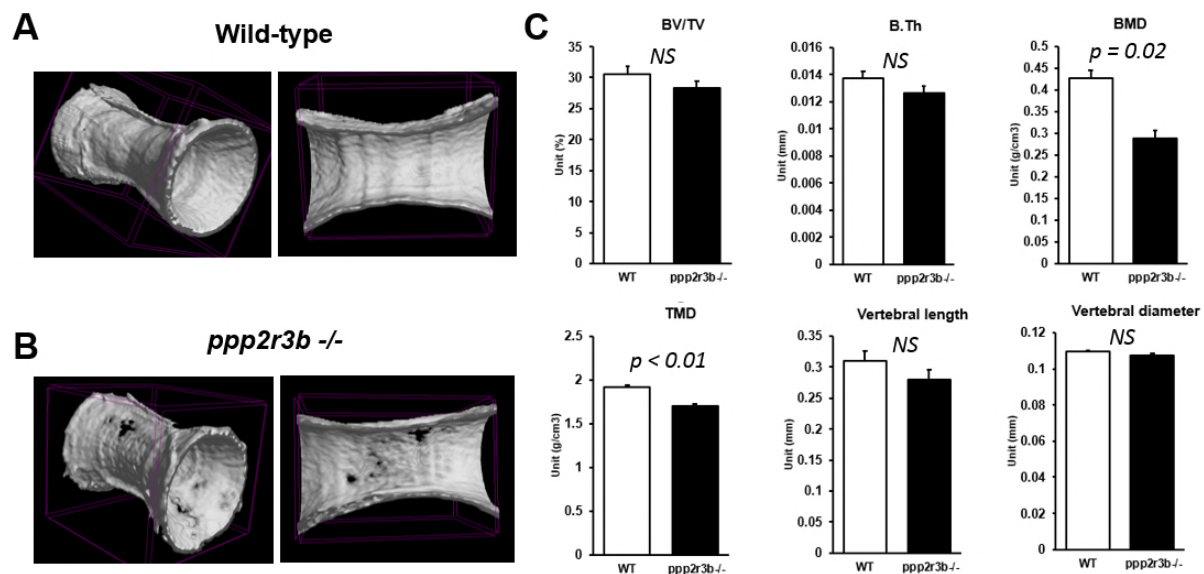

**Figure 7. Reduced mineral density of vertebral cortical bone in *ppp2r3b*<sup>-/-</sup> mutants.**

(A,B) Representative 3D and cross-sectional images from microCT scans of vertebrae in wild-type and *ppp2r3b*<sup>-/-</sup> mutant zebrafish at 36 dpf. Note holes are apparent in the mutant vertebrae. (C) Quantification of a selection of cortical bone parameters measured in wild-type and *ppp2r3b*<sup>-/-</sup> mutant vertebrae (*n*=3). BV/TV, bone volume/tissue volume; B.Th, bone thickness; BMD, bone mineral density; TMD, tissue mineral density. *P*-values are given (*t*-test). NS, not significant.
